# Supplementary material for: Hepatic Sam68 Regulates Systemic Glucose Homeostasis and Insulin Sensitivity
Source: MDPI journal article supplement (doi:10.3390/ijms231911469), 2022-09-29
Supplement: s1 [file s1]

## Hepatic Sam68 regulates glucose homeostasis and insulin sensitivity

Aijun Qiao, Wenxia Ma, Ying Jiang, Chaoshan Han, Baolong Yan, Junlan Zhou and Gangjian Qin

### Supplementary Figures

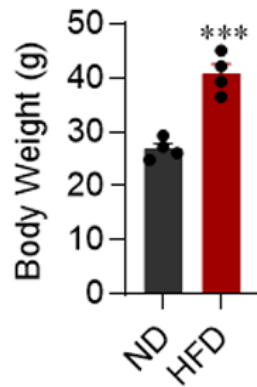

**Figure S1.** Body weight of C57BL/6J male mice fed on normal diet (ND) and high fat diet (HFD) for 12 weeks.  $n=4$  per group. \*\*\* $p < 0.001$ . Unpaired two-tailed Student's  $t$  test.

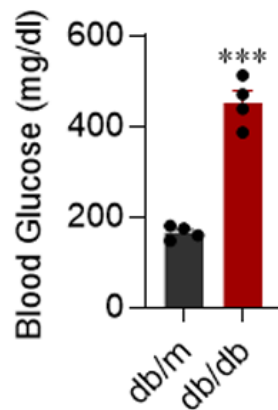

**Figure S2.** Blood glucose levels in db/db and db/m (control) male mice at age of 8–12 weeks.  $n=4$  per group. \*\*\* $p < 0.001$ . Unpaired two-tailed Student's  $t$  test.

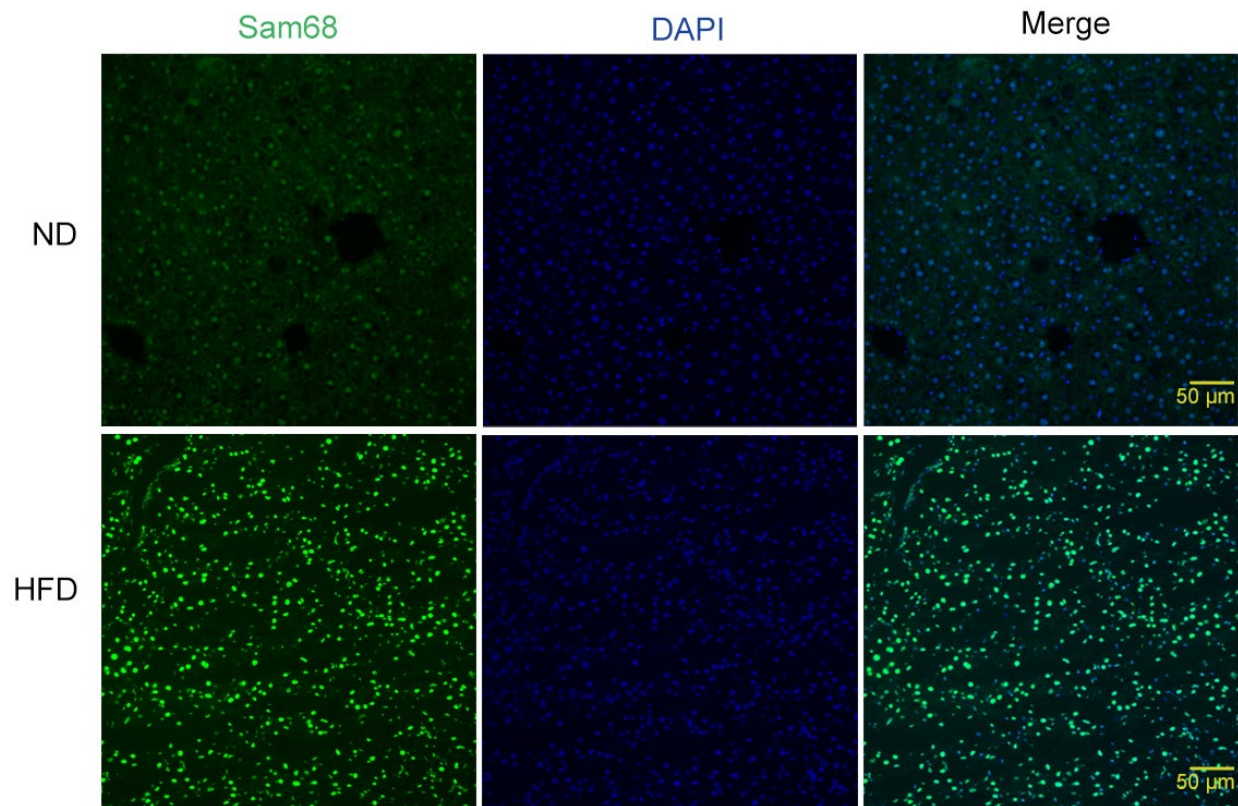

**Figure S3. Sam68 protein expression in the nucleus of hepatocytes is increased in the HFD-induced obese (prediabetic) mice.** Liver sections were obtained from C57BL/6J mice fed on HFD or ND for 12 weeks and stained with anti-Sam68 antibody (green) and DAPI (blue).

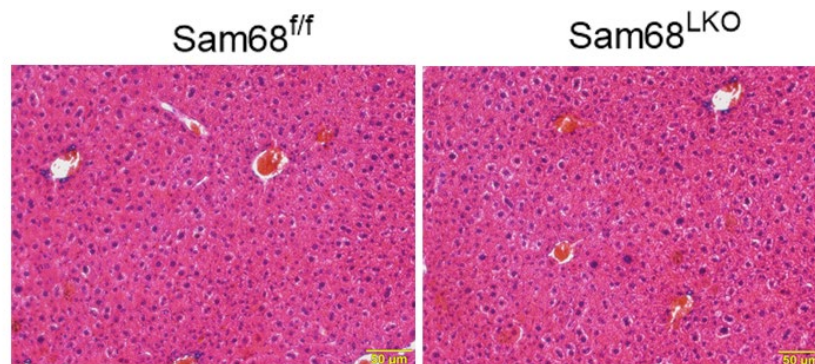

**Figure S4. Representative images of H&E staining in the liver of Sam68<sup>LKO</sup> mice and Sam68<sup>f/f</sup> mice at 8-12 weeks old.**

## Supplementary Tables

**Table S1. List of PCR primers**

|                                                       | Forward sequence         | Reverse sequence          |
|-------------------------------------------------------|--------------------------|---------------------------|
| <b>For assessment of gene expression with qRT-PCR</b> |                          |                           |
| mSREBP-                                               | GGAGCCATGGATTGCACATT     | GGCCCGGGAAGTCACTGT        |
| mPGC-1 $\alpha$                                       | AGCCGTGACCACTGACAACGAG   | GCTGCATGGTTCTGAGTGCTAAG   |
| mPEPCK                                                | CCACAGCTGCTGCAGAACAA     | GAAGGGTCGCATGGCAAA        |
| mG6pase                                               | TGGGCAAAATGGCAAGGA       | TCTGCCCCAGGAATCAAAAAT     |
| m $\beta$ -actin                                      | GTATGGAATCCTGTGGCATC     | AAGCACTTGCGGTGCACGAT      |
| mSam68                                                | GATATCTGTCAGGAGCAGTTTCT  | CTCCTCGTCCTCTCACAGATA     |
| hPGC-1 $\alpha$                                       | AACAGCAGCAGAGACAAATGCACC | TGCAGTTCCAGAGAGTTCCACACT  |
| hPEPCK                                                | AAGGAGGATGCCCTGAACCTGAAA | TGCACCTTATGGATGGGAAAGGGA  |
| hG6Pase                                               | TGAATGGCTGCAGTGACCCAGATA | TGGATGTGGAGCCAGTGGGAAGAAT |
| h $\beta$ -actin                                      | AGGATGCAGAAGGAGATCACTG   | GGGTGTAACGCAACTAAGTCATAG  |
| h-Sam68                                               | GCGAGTGCTGATACCTGTCAAG   | TCATTGAGCCCTTTCCCAAT      |
| <b>For ChIP-qPCR</b>                                  |                          |                           |
| mPGC-1 $\alpha$                                       | GGGCTGCCTTGGAGTGACGTC    | AGTCCCCAGTCACATGACAAAG    |
| mG6pase                                               | GGAGGGCAGCCTCTAGCACTGTCA | TCAGTCTGTAGGTCAATCCAGCCC  |
| mPEPCK                                                | GGCCTCCCAACATTCAATTAAC   | GTAGCCCGCCCTCCTTGCTTTA    |
| <b>For genotyping of Sam68<sup>LKO</sup> mice</b>     |                          |                           |
| Alb-Cre                                               | TGCCTGCATTACCGGTGCGATGC  | CCATGAGTGAACGAACCTGGTGC   |

**Table S2. List of antibodies**

| Name                                       | Catalogue | Company Name   |
|--------------------------------------------|-----------|----------------|
| PGC-1 $\alpha$                             | ab54481   | Abcam          |
| G6Pase                                     | ab83690   | Abcam          |
| Sam68 for WB and Immunofluorescence        | ab76471   | Abcam          |
| PEPCK                                      | 12940     | Cell Signaling |
| $\beta$ -actin                             | 8457      | Cell Signaling |
| $\beta$ -tubulin                           | 2146      | Cell Signaling |
| $\alpha$ -tubulin                          | 2144      | Cell Signaling |
| p-AKT (Thr308)                             | 2965      | Cell Signaling |
| p-AKT (Ser473)                             | 4060      | Cell Signaling |
| Mouse IgG Sepharose Bead Conjugate         | 3420      | Cell Signaling |
| AKT                                        | 9272      | Cell Signaling |
| CRTC2                                      | PA5-72994 | Thermo Fisher  |
| Sam68 (7-1) for co-IP                      | sc-1238   | Santa Cruz     |
| Sam68 (7-1) for ChIP                       | sc-1238AC | Santa Cruz     |
| Anti-mouse IgG, HRP-linked antibody        | 7076      | Cell Signaling |
| Anti-rabbit IgG, HRP-linked antibody       | 7074      | Cell Signaling |
| Alexa Fluor 488-conjugated anti-rabbit IgG | A32790    | Thermo Fisher  |
